# Supplementary material
Source: HighWire-hosted journal article supplement (https://thorax.bmj.com/content/71/9/862)
Supplement: inline-supplementary-material-1 [file inline-supplementary-material-1.pdf]

Supplemental Figure. Users of Inhaled Tobramycin Solution in the Ontario Public Drug Program, between Q2 2007— Q1 2015

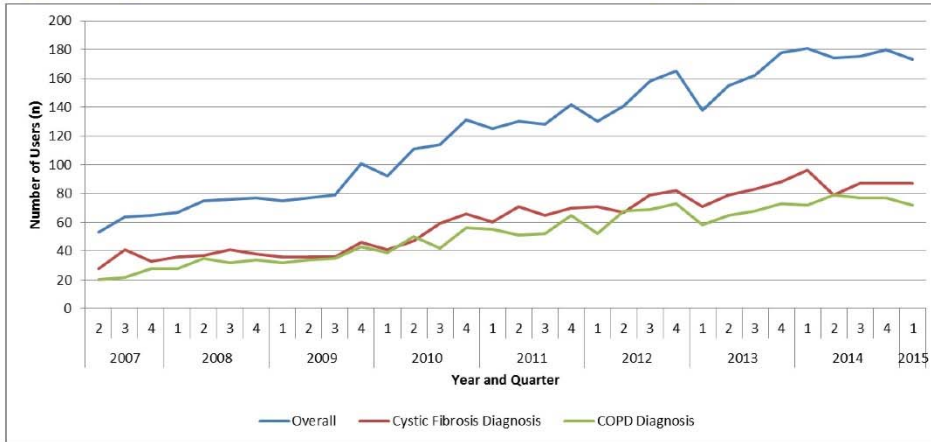

Note: Patients with COPD did not have a diagnosis of cystic fibrosis
